# Supplementary material for: The Effect of Drying Methods and Extraction Techniques on Oleuropein Content in Olive Leaves
Source: MDPI journal article supplement (doi:10.3390/plants11070865), 2022-03-24
Supplement: s1 [file s1]

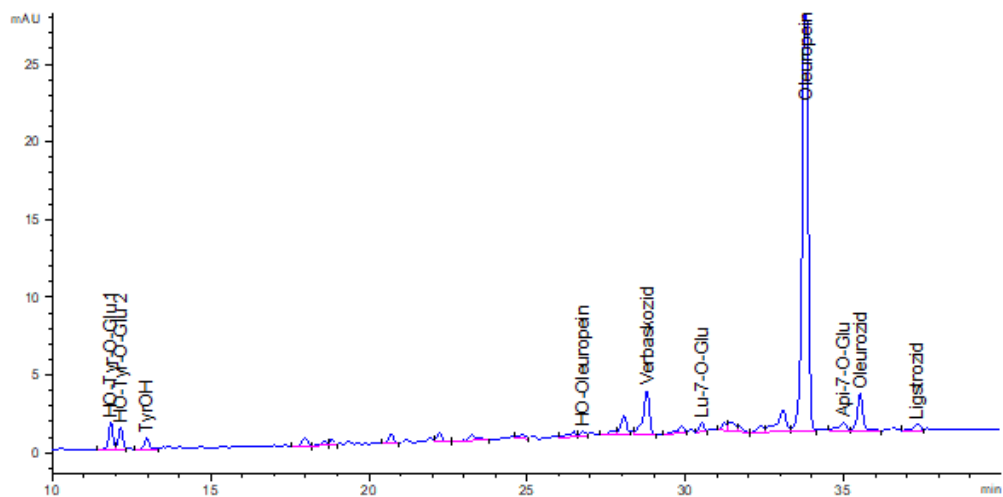

Figure S1: Chromatogram of Istrska belica air drying (room T) – DES1

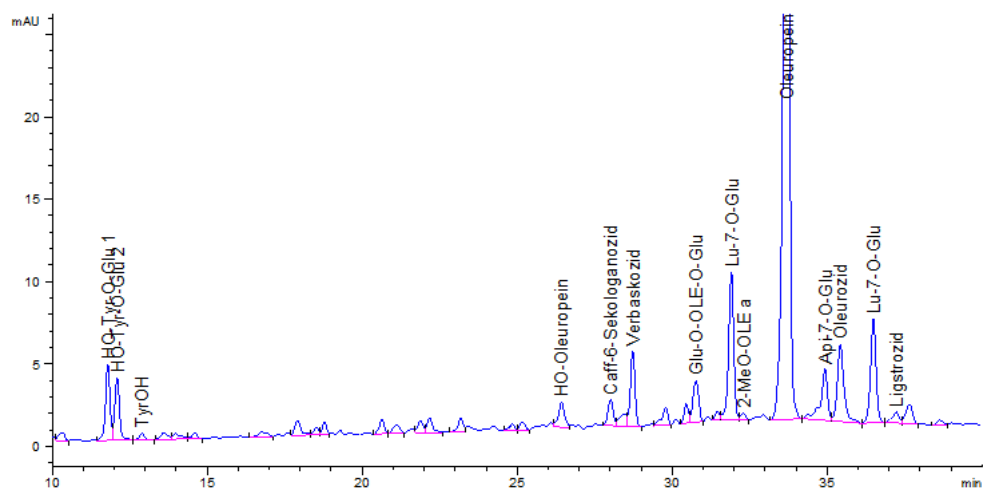

Figure S2: Chromatogram of Istrska belica – air drying (T=105°C) – DES2

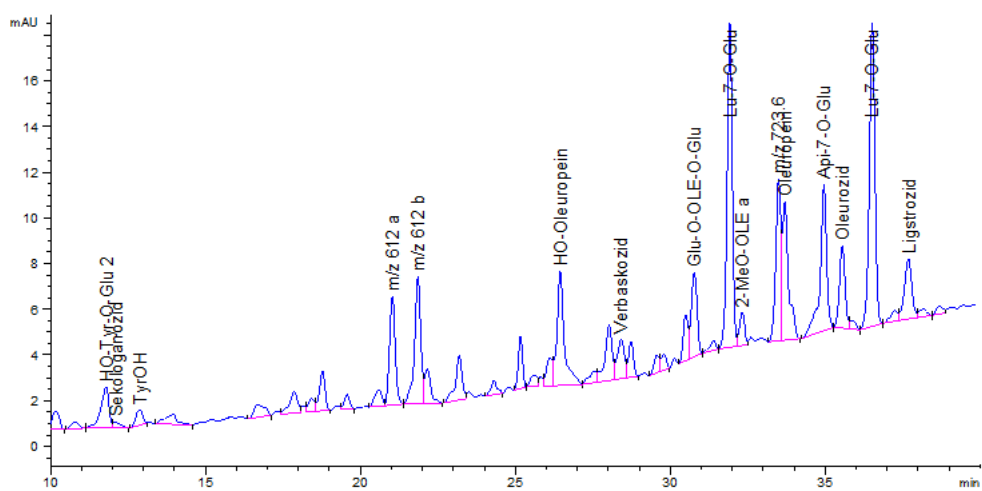

Figure S3: Chromatogram of Istrska belica - freeze drying – DES3

Table S1. Content of active compound (C) in mg<sub>c</sub> / g d.w. of active compounds of *Istrska belica* and *Leccino* methanol extracts at a different type of drying. Data are means ± SD from three replicates.

| Type                              | <i>Istrska belica</i> - air drying (room T) | <i>Istrska belica</i> - air drying (T=105°C) | <i>Istrska belica</i> - freeze drying | <i>Leccino</i> - air drying (room T) | <i>Leccino</i> - air drying (T=105°C) | <i>Leccino</i> - freeze drying |
|-----------------------------------|---------------------------------------------|----------------------------------------------|---------------------------------------|--------------------------------------|---------------------------------------|--------------------------------|
| Compound                          | mg <sub>c</sub> / g d.w.                    |                                              |                                       |                                      |                                       |                                |
| <b>2-MeO-OLE a</b> <sup>1</sup>   | n.d.                                        | n.d.                                         | 2.71±0.06                             | n.d.                                 | n.d.                                  | 1.21±0.02                      |
| <b>2-MeO-OLE b</b> <sup>2</sup>   | n.d.                                        | n.d.                                         | 2.22±0.05                             | n.d.                                 | n.d.                                  | 1.10±0.02                      |
| <b>Api</b> <sup>3</sup>           | 1.5±0.03                                    | 1.11±0.02                                    | 0.51±0.01                             | 1.71±0.04                            | 1.31±0,03                             | 0.70±0.01                      |
| <b>HO-Ole</b> <sup>4</sup>        | 1.01±0.02                                   | 1.40±0.03                                    | 1.63±0.03                             | 1.11±0.02                            | 1.10±0,02                             | 1.10±0.02                      |
| <b>HO-Tyr-O-Glu1</b> <sup>5</sup> | 3.21±0.07                                   | 4.31±0.09                                    | 0.72±0.01                             | 6.73±0.14                            | 9.01±0,19                             | 0.81±0.02                      |
| <b>HO-Tyr-O-Glu2</b> <sup>6</sup> | 2.60±0.05                                   | 3.12±0.07                                    | 0                                     | 6.91±0.14                            | 6.32±0,13                             | n.d.                           |
| <b>Lig</b> <sup>7</sup>           | 1.21±0.03                                   | 1.10±0.02                                    | 0.91±0.02                             | 1.02±0.02                            | 0.71±0,01                             | 0.40±0.01                      |
| <b>Lu-7-O-Glu</b> <sup>8</sup>    | 0.92±0.02                                   | 1.51±0.03                                    | 2.12±0.04                             | 2.62±0.05                            | 1.32±0,03                             | 1.30±0.03                      |
| <b>m/z 723.6</b> <sup>9</sup>     | n.d.                                        | n.d.                                         | 2.24±0.05                             | n.d.                                 | n.d.                                  | 3.11±0.07                      |
| <b>Ole</b> <sup>10</sup>          | 77.71±1.63                                  | 70.10±1.47                                   | 4.93±0.11                             | 66.10±1.39                           | 60.51±1,27                            | 3.32±0.07                      |
| <b>Ols</b> <sup>11</sup>          | 6.10±0.13                                   | 4.40±0.09                                    | 0.92±0.02                             | 7.71±0.16                            | 6.50±0,14                             | 1.01±0.02                      |
| <b>Sec</b> <sup>12</sup>          | n.d.                                        | n.d.                                         | 1.31±0.03                             | n.d.                                 | n.d.                                  | 1.50±0.03                      |
| <b>TyrOH</b> <sup>13</sup>        | 1.52±0.03                                   | 0.70±0.01                                    | 0.53±0.01                             | 2.82±0.06                            | 1.08±0,02                             | 0.80±0.02                      |
| <b>Ver</b> <sup>14</sup>          | 6.90±0.14                                   | 1.40±0.03                                    | 0.61±0.01                             | 6.13±0.13                            | 1.61±0,03                             | 0.81±0.02                      |

<sup>1</sup>Methoxy-oleuropein a, <sup>2</sup>Methoxy-oleuropein b, <sup>3</sup>Apigenin, <sup>4</sup>Hydroxyoleuropein, <sup>5</sup>Hydroxytyrosol glucoside 1, <sup>6</sup>Hydroxytyrosol glucoside 2, <sup>7</sup>Ligstroside, <sup>8</sup>Luteolin-7-Glucoside, <sup>9</sup>isomer m/z 723.6, , <sup>10</sup>Oleuropein, <sup>11</sup>Oleuroside, <sup>12</sup>Secologanoside, <sup>13</sup>Hydroxytyrosole, <sup>14</sup>Verbascoside; <sup>16</sup>not defined; SD ± means the standard deviation

Table S2: Content of active compound (C) in mg<sub>c</sub> / g d.w. in eutectic extracts of *Istrska belica* and *Leccino*. Data are means ± SD from three replicates

| Type                               | DES1                     | DES2           | DES3          | DES4           | DES5           | DES6           |
|------------------------------------|--------------------------|----------------|---------------|----------------|----------------|----------------|
| Compound                           | mg <sub>c</sub> / g d.w. |                |               |                |                |                |
| <b>Api-7-O-Glu<sup>1</sup></b>     | 1.91<br>±0.03            | 2.61<br>±0.05  | 1.12<br>±0.02 | 3.1<br>±0.06   | 3.92<br>±0.07  | 1.41<br>±0.02  |
| <b>Glu-O-OLE-O-Glu<sup>2</sup></b> | 1.72<br>±0.03            | 1.71<br>±0.03  | 0.63<br>±0.01 | 1.8<br>±0.03   | 2.31<br>±0.04  | 0.3<br>±0.01   |
| <b>HO-Ole<sup>3</sup></b>          | 1.21<br>±0.02            | 1.12<br>±0.02  | 1.2<br>±0.02  | 0.9<br>±0.02   | 1.24<br>±0.02  | 0.41<br>±0.01  |
| <b>HO-Tyr-O-Glu 1<sup>4</sup></b>  | 1.91<br>±0.03            | 2.51<br>±0.05  | n.d.          | 3.81<br>±0.07  | 5.91<br>±0.11  | n.d.           |
| <b>HO-Tyr-O-Glu 2<sup>5</sup></b>  | 1.61<br>±0.03            | 2.11<br>±0.04  | 0.41<br>±0.01 | 4.22<br>±0.08  | 5.51<br>±0.09  | 0.40<br>±0.01  |
| <b>Lig<sup>6</sup></b>             | 0.71<br>±0.01            | 0.52<br>±0.01  | 0.51<br>±0.01 | 1.11<br>±0.02  | 0.53<br>±0.01  | 0.32<br>±0.01  |
| <b>Lu<sup>7</sup></b>              | n.d. <sup>18</sup>       | n.d.           | n.d.          | 0.22<br>±0.01  | 0.23<br>±0.01  | n.d.           |
| <b>Lu-7-O-Glu<sup>8</sup></b>      | 3.41<br>±0.06            | 4.13<br>±0.08  | 2.2<br>±0.04  | 2.53<br>±0.05  | 3.11<br>±0.06  | 2.90<br>±0.5   |
| <b>m/z 612 a<sup>9</sup></b>       | n.d.                     | n.d.           | 0.73<br>±0.01 | n.d.           | n.d.           | 0.21<br>±0.01  |
| <b>m/z 612 b<sup>10</sup></b>      | n.d.                     | n.d.           | 0.92<br>±0.01 | n.d.           | n.d.           | 0.41<br>±0.011 |
| <b>m/z 723.6<sup>11</sup></b>      | n.d.                     | n.d.           | 1.1<br>±0.02  | n.d.           | n.d.           | 1.21<br>±0.02  |
| <b>Ole<sup>12</sup></b>            | 45<br>±0.81              | 43.12<br>±0.86 | 0.92<br>±0.02 | 30.22<br>±0.54 | 43.41<br>±0.78 | 0.30<br>±0.01  |
| <b>Ols<sup>13</sup></b>            | 3.72<br>±0.07            | 3.73<br>±0.07  | 0.52<br>±0.01 | 3.91<br>±0.07  | 5.12<br>±0.09  | 0.4<br>±0.01   |
| <b>Sec<sup>14</sup></b>            | n.d.                     | n.d.           | 0.13<br>±0.01 | n.d.           | n.d.           | n.d.           |
| <b>TyrOH<sup>15</sup></b>          | 1.03<br>±0.01            | 0.22<br>±0.01  | 0.12<br>±0.01 | 1.61<br>±0.03  | 0.35<br>±0.01  | 0.31<br>±0.01  |
| <b>Ver<sup>16</sup></b>            | 7.31<br>±0.13            | 2.51<br>±0.05  | 0.32<br>±0.01 | 6.6<br>±0.12   | 2.21<br>±0.04  | 0.21<br>±0.01  |
| <b>Caff-6-sec<sup>17</sup></b>     | 1.30<br>±0.02            | 0.92<br>±0.02  | n.d.          | 0.61<br>±0.01  | 0.61<br>±0.01  | n.d.           |

<sup>1</sup>Apigenin-7-glucoside, <sup>2</sup>Glucoside-oleuropein, <sup>3</sup>Hydroxyoleuropein, <sup>4</sup>Hydroxytyrosol glucoside 1, <sup>5</sup>Hydroxytyrosol glucoside 2, <sup>6</sup>Ligstroside, <sup>7</sup>Luteolin, <sup>8</sup>Luteolin-7-Glucoside, <sup>9</sup>isomer m/z 612 a, <sup>10</sup>isomer m/z 612 b, <sup>11</sup>isomer m/z 723.6, <sup>12</sup>Oleuroside, <sup>13</sup>Oleuropein, <sup>14</sup>Secologanoside, <sup>15</sup>Hydroxytyrosol, <sup>16</sup>Verbascoside, <sup>17</sup>Caffeoyl-6-secologanoside; <sup>18</sup>Istrska belica - air drying (room T), <sup>19</sup>Istrska belica - air drying (T=105°C), <sup>20</sup>Istrska belica - freeze drying, <sup>21</sup>Leccino - air drying (room T), <sup>22</sup>Leccino - air drying (T=105°C), <sup>23</sup>Leccino - freeze drying; <sup>18</sup>not defined; SD ± means the standard deviation
